# Supplementary material for: α-Lipoic acid prevents the intestinal epithelial monolayer damage under heat stress conditions: model experiments in Caco-2 cells
Source: PubMed Central journal article supplement (PMC5960005; doi:10.1007/s00394-017-1442-y), 2017-03-27
Supplement: 394_2017_1442_MOESM2_ESM.pdf [file 394_2017_1442_MOESM2_ESM.pdf]

**Article title:**

$\alpha$ -lipoic acid ameliorates the intestinal epithelial monolayer damage under heat stress conditions.

**Journal name:**

European Journal of Nutrition

**Authors:**

Soheil Varasteh, Johanna Fink-Gremmels, Johan Garssen, Saskia Braber

**Corresponding author:**

Dr. Saskia Braber

Utrecht University, Department of Pharmaceutical Sciences,  
Division of Pharmacology.

Universiteitsweg 99, 3584 CG, Utrecht, The Netherlands

Fax: +31(0)30 253 7900

Email: [s.braber@uu.nl](mailto:s.braber@uu.nl)

## Supplementary Figure 2. Primer sequences used for qRT-PCR

| Gene           | Primer sequence (5'-3') |                          | AT   | References     |
|----------------|-------------------------|--------------------------|------|----------------|
|                | Forward                 | Reverse                  |      |                |
| <b>β-Actin</b> | CTGGAACGGTGAAGGTGACA    | AAGGGACTTCCTGTAACAATGCA  | 63   | NM_001101      |
| <b>HSP70</b>   | AGAGCCGAGCCGACAGAG      | CACCTTGCCGTGTTGGAA       | 57   | NG_011855.1    |
| <b>Nrf2</b>    | CAGGTTGCCACATTCCCAAATCA | AGCAATGAAGACTGGGCTCTCGAT | 60   | NM_001145413.2 |
| <b>TGF-β</b>   | CACGTGGAGCTGTACCAGAA    | GAACCCGTTGATGTCCACTT     | 60   | NM_000660.5    |
| <b>COX-2</b>   | GGAACACAACAGAGTATGCG    | AAGGGGATGCCAGTGATAGA     | 60   | NM_000963.3    |
| <b>HO-1</b>    | GCCACCAAGTTCAAGCAGCT    | CAGTGCCACGGTAAGGAAG      | 61.2 | NM_002133.2    |
